# 1 **The fate of deleterious variants in a barley genomic prediction** 2 **population**

3  
4 Kono TJY<sup>1</sup>, Liu C<sup>1</sup>, Vonderharr EE<sup>1</sup>, Koenig, D<sup>2</sup>, Fay JC<sup>3</sup>, Smith KP<sup>1</sup>, Morrell PL<sup>1</sup>

5  
6 1: Department of Agronomy and Plant Genetics, University of Minnesota

7 2: Department of Botany & Plant Sciences, University of California, Riverside

8 3: Department of Biology, University of Rochester

9

10 Corresponding author: Peter L. Morrell

11

## 12 **Abstract**

13 Targeted identification and purging of deleterious genetic variants has been proposed as a  
14 novel approach to animal and plant breeding. This strategy is motivated, in part, by the  
15 observation that demographic events and strong selection associated with cultivated species pose  
16 a “cost of domestication.” This includes an increase in the proportion of genetic variants where a  
17 mutation is likely to reduce fitness. Recent advances in DNA resequencing and sequence  
18 constraint-based approaches to predict the functional impact of a mutation permit the  
19 identification of putatively deleterious SNPs (dSNPs) on a genome-wide scale. Using exome  
20 capture resequencing of 21 barley 6-row spring breeding lines, we identify 3,855 dSNPs among  
21 497,754 total SNPs. In order to polarize SNPs as ancestral versus derived, we generated whole  
22 genome resequencing data of *Hordeum murinum* ssp. *glaucum* as a phylogenetic outgroup. The  
23 dSNPs occur at higher density in portions of the genome with a higher recombination rate than in  
24 pericentromeric regions with lower recombination rate and gene density. Using 5,215 progeny  
25 from a genomic prediction experiment, we examine the fate of dSNPs over three breeding cycles.  
26 Average derived allele frequency is lower for dSNPs than any other class of variants. Adjusting

27 for initial frequency, derived alleles at dSNPs reduce in frequency or are lost more often than  
28 other classes of SNPs. The highest yielding lines in the experiment, as chosen by standard  
29 genomic prediction approaches, carry fewer homozygous dSNPs than randomly sampled lines  
30 from the same progeny cycle. In the final cycle of the experiment, progeny selected by genomic  
31 prediction have a mean of 5.6% fewer homozygous dSNPs relative to randomly chosen progeny  
32 from the same cycle.

### 33 **Author Summary**

34 The nature of genetic variants underlying complex trait variation has been the source of debate in  
35 evolutionary biology. Here, we provide evidence that agronomically important phenotypes are  
36 influenced by rare, putatively deleterious variants. We use exome capture resequencing and a  
37 hypothesis-based test for codon conservation to predict deleterious SNPs (dSNPS) in the parents  
38 of a multi-parent barley breeding population. We also generated whole-genome resequencing  
39 data of *Hordeum murinum*, a phylogenetic outgroup to barley, to polarize dSNPs by ancestral  
40 versus derived state. dSNPs occur disproportionately in the gene-rich chromosome arms, rather  
41 than in the recombination-poor pericentromeric regions. They also decrease in frequency more  
42 often than other variants at the same initial frequency during recurrent selection for grain yield  
43 and disease resistance. Finally, we identify a region on chromosome 4H that strongly associated  
44 with agronomic phenotypes in which dSNPs appear to be hitchhiking with favorable variants.  
45 Our results show that targeted identification and removal of dSNPs from breeding programs is a  
46 viable strategy for crop improvement, and that standard genomic prediction approaches may  
47 already contain some information about unobserved segregating dSNPs.

48

## 49 **Introduction**

50 Gains from selection in plant and animal breeding could be improved through a better  
51 understanding of the genetic architecture of complex traits. One current source of debate is the  
52 relative frequency of genetic variants that contribute to complex traits. At mutation-drift  
53 equilibrium, the majority of genetic variants segregating in a population are expected to be rare  
54 [1,2]. If a genetic variant affects a phenotype, it is more likely to be subject to selection, with the  
55 strength of selection proportional to the magnitude of phenotypic impact [3]. Since most new  
56 mutations with a phenotypic impact are expected to be deleterious [4–6], variants contributing to  
57 complex trait variation will likely be under purifying selection [7,8]. Thus, a substantial portion  
58 of genetic variants that affect phenotypes may occur as “rare alleles of large effect” (RALE) [3].  
59 Consistent with the RALE hypothesis, association mapping studies find evidence that rare alleles  
60 have larger estimated phenotypic effects than common alleles [9]. Because of their frequency,  
61 rare alleles are more difficult to associate with a phenotype. Alleles with relatively large effects  
62 on phenotype are more readily detected [10,11] but are unlikely to be representative of the  
63 majority of genetic variants that contribute to phenotypic variation [10,12].

64 Segregating variants that affect fitness are more likely to be deleterious than beneficial [13]  
65 and are thus more likely to be under purifying selection. Consistent with this postulate, low  
66 frequency genetic variants in human populations are enriched for amino acid replacements [e.g.,  
67 14], which likely have direct effects on protein function. The effect of individual dSNPs on  
68 fitness is expected to be small, but in aggregate their impact may be substantial [cf. 13].  
69 Domesticated plants and animal populations have often experienced reductions in effective  
70 population size and strong selection associated with domestication and improvement that could

71 result in exacerbated effects of deleterious variants as a genetic “cost of domestication” [15].  
72 Empirical evidence from a variety of organisms appears to support this conjecture, with  
73 comparisons in cassava [16], dogs [17], grapes [18], and rice [19] showing evidence of an  
74 increased proportion of both fixed and segregating dSNPs relative to wild progenitors [see also  
75 20,21].

76 Putative dSNPs can be readily identified based on phylogenetic conservation, particularly  
77 for coding polymorphisms [22,23]. SNPs that are phenotype-changing in *Arabidopsis thaliana*  
78 are more likely to annotate as deleterious than “tolerated” (less conserved) amino acid changing  
79 SNPs at similar frequencies [24]. Indeed, a number of putatively causative amino acid changing  
80 SNPs that contribute to agronomic phenotypes annotate as deleterious [25]. However, individual  
81 inbred lines for many cultivated species carry hundreds to thousands of dSNPs [25,26]. The vast  
82 majority of dSNPs occur at low frequency [19,25] and thus are unlikely to serve as the primary  
83 causative variants for essential agronomic traits. Because of their relative ease of identification,  
84 elimination of dSNPs either through selection against them in aggregate [20,27–29] or through  
85 targeted replacement of individual dSNPs [27,28,30] provides a potential means of crop  
86 improvement.

87 The phenotypic consequences of dSNPs is determined by their relative degree of dominance,  
88 the proportion of variants that occur in the homozygous state, and the fitness effects of individual  
89 dSNPs [17,20,31–34]. Additionally, the genomic locations of dSNPs is an important factor in  
90 how effective purifying selection can be in culling them from populations. This is due to  
91 recombination rate variation placing limits on the efficacy of purifying selection [35,36]. A  
92 larger proportion of variants may be deleterious in low recombination regions of a genome [13]  
93 as has been observed in sunflower [26], rice [19], and soybean [25]. There is evidence from

94 studies of humans that variants in low recombination regions may have larger fitness  
95 consequences or explain more of the variation for quantitative traits [37,38].

96 Modern breeding programs use genome-wide prediction approaches which are designed to  
97 integrate large numbers of markers in the estimation of phenotypic values for quantitative traits  
98 [39]. This typically involves the use of a training panel of individuals with both genotypic and  
99 phenotypic information. Prediction and selection can be performed in a panel of related  
100 individuals with only genotypic data. There is evidence that the probable effect of genetic  
101 variants on quantitative phenotypic variation can vary by functional class and that prediction  
102 accuracy can be improved through differential weighting of variants [34,40].

103 The purpose of this study is to assess the fate of dSNPs in a breeding population subject to  
104 genomic prediction and selection. The experimental barley breeding population was developed at  
105 the University of Minnesota [41]. Genomic prediction was used to select lines with  
106 improvements in yield and resistance to the fungal disease Fusarium head blight (FHB), two  
107 unfavorably correlated quantitative traits. Phenotypic data was collected for yield,  
108 deoxynivalenol (DON) concentration (a measure of severity of fungal infection), and for plant  
109 height, which was not under selection. The population showed gains in both yield and FHB  
110 resistance over three cycles of crossing and selection, with an index of yield and reduced DON  
111 concentration showing consistent gain over cycles [41]. The pedigreed design brings the rarest  
112 variants to ~3% frequency, thus improving the potential to assess the contributions of putative  
113 dSNPs to agronomic phenotypes. The major questions we seek to address are: (1) How common  
114 are putative dSNPs in elite barley breeding material? (2) Are putative dSNPs uniformly  
115 distributed across the genome or concentrated in genomic regions with lower rates of  
116 recombination?; and (3) What is their fate through rounds of selection and breeding gain in an

117 experimental breeding population? We also make use of a linear mixed model to estimate the  
118 proportion of phenotypic variance that can be explained based on SNPs genotyped in our panel  
119 or imputed from parents onto progeny. We find a genomic region associated with agronomic  
120 traits in which dSNPs may be hitchhiking due to strong selection in this population.

## 121 **Results**

### 122 **Summary of Resequencing Data**

123 We make use of exome capture resequencing to identify nucleotide sequence variants in 21  
124 barley breeding lines from three barley breeding programs (S1 Table). The 5,215 progeny in the  
125 experiment were genotyped using a 384 SNP Illumina assay [41]. Based on observed genotypes  
126 in progeny in the known pedigree, we track the fate of genotyped and imputed SNPs through  
127 three breeding cycles (S1 Fig). All lines are part of a genomic prediction experiment [41] where  
128 sets of progeny were selected based on genomic prediction for yield and fungal disease  
129 resistance. A second pool of progeny was drawn at random in each cycle and subject to the same  
130 field testing for yield and disease resistance as selected progeny.

131 The 21 parents (Cycle 0) in the experiment were subjected to exome capture  
132 resequencing, resulting in the identification of 497,754 SNPs. Of these, 407,285 map to portions  
133 of the reference genome that could be assigned to barley chromosomes and are subject to further  
134 analysis (Table 1). The intersections of three deleterious annotation approaches identified 3,855  
135 dSNPs at 62,826 nonsynonymous sites, including 1,877 early stop codons in the founding  
136 parents. More of the the dSNPs are private to North Dakota lines than to the other programs  
137 (Table 2), which has more private SNPs across classes. The numbers of dSNPs is remarkably

138 similar among lines with a mean of 677.67 ( $\pm$  16.51), though the number of dSNPs private to a  
139 line varies more dramatically (from 11 to 172) (S2 Table). The unfolded site frequency spectrum  
140 (SFS) for 283,021 SNPs with inferred ancestral state indicates that dSNPs in the founders occur  
141 primary in the rarest frequency classes (Figure 1), a trend that is also evident among all variants  
142 in the folded SFS (S2 Fig).

143 SNP density was highest along chromosome arms and lower in pericentromeric regions (S3  
144 Fig), consistent with the reports of the distribution of gene density [42,43]. Using  
145 pericentromeric regions as defined based on barley recombination rate and gene density reported  
146 by [42], we identify 71,939,192 bp (81.3%) of capture targets in euchromatic regions and  
147 16,511,574 bp (18.7%) in pericentromeres (A BED file of positions covered by exome capture is  
148 available at <http://conservancy.umn.edu/XXXX>). Codon density was similar within exome  
149 capture from the two regions. Euchromatic regions include 6,945,584 bp (81.3%) of codons  
150 within capture targets and 1,592,281 bp (18.7%) in pericentromeric regions. The euchromatic  
151 regions include 401,148 (86.6%) of SNPs versus 62,060 (13.4%) of SNPs in pericentromeres.  
152 This resulted in 3,331 (87.7%) dSNPs in euchromatin and 466 (12.3%) dSNPs in pericentromeric  
153 regions. Thus the proportion of dSNPs per codon is lower in the pericentromere than in higher  
154 recombination regions (Figure 2).

155 To infer the ancestral state of variants in cultivated barley, we performed whole genome  
156 resequencing of *H. murinum* ssp. *glaucum*, yielding 371,255,479 reads. A divergence rate setting  
157 of 3% in Stampy [44] resulted in the largest percentages of reads mapping to the reference  
158 genome. Genome-wide coverage was estimated as 37 X. This permitted estimation of ancestral  
159 state for 283,021 or 69.5% of barley SNPs. Results of ancestral state inference by functional  
160 class of variants is show in S3 Table.

## 161 **Genotyping Data**

162 The final dataset used for analysis consisted of 5,215 individuals. Of the 384 SNPs on the  
163 custom Illumina Veracode assay [41], four were eliminated because of errors in Mendelian  
164 inheritance between parents and progeny. Three SNPs with >20% missing genotypes were also  
165 excluded, resulting in 377 SNPs segregating among progeny (S3 Fig). For 16 SNPs, either  
166 genetic or physical positions needed to be interpolated from flanking SNPs (see Supplemental  
167 Text). The parental lines and progeny produced an average of 366.5 ( $\pm$  40.1) genotyped SNPs.  
168 Pairwise diversity averaged 0.32 across cycles, with observed heterozygosity between 8 and 15%  
169 in C1 through C3 (S4 Table).

170 Using the 377 genotyped Veracode SNPs, we imputed genotypes for all variants in the  
171 pedigreed populations using the program AlphaPeel [45]. Imputed genotypes are reported in  
172 AlphaPeel output as the expected dosage of the non-reference allele at each site. Recombination  
173 probabilities are modeled from interpolated genetic distances between observed markers with  
174 known genetic distances [45]. Both the unfolded (S4 Fig) and folded SFS (with all variants) (S5  
175 Fig), demonstrate that dSNPs remain at low frequency across generations in the population.  
176 Average pairwise diversity for SNPs resequenced in the founder lines and imputed onto progeny  
177 was  $\sim$ 0.19 for synonymous SNPs and  $\sim$ 0.12 for dSNPs, with noncoding and nonsynonymous  
178 having intermediate levels of diversity (S5 Table).

## 179 **Putatively Deleterious SNPs and Phenotypic Variation**

180 A total of 676 of the 5,215 individuals have phenotypic data for grain yield, DON  
181 concentration, and plant height. Yield increased and average DON concentration decreased over



182 three cycles of selection (Figure 3). An index of yield and DON concentration showed steady  
183 improvement in each cycle [41]. Plant height, which was not subject to selection in this  
184 population, increased over the course of the experiment (Figure 3). The number of putative  
185 dSNPs that were homozygous for the derived allele within an individual is significantly  
186 correlated with all three measured phenotypes (Figure 4). Yield is negatively correlated with the  
187 number of homozygous derived SNPs across all classes. The correlation is greatest for  
188 noncoding (the largest class of) SNPs. Based on a product moment correlation, the correlation is  
189 significant at  $p < 0.05$  for noncoding and nonsynonymous, and at  $p < 0.001$  for dSNPs (Table 3).  
190 For DON concentration and plant height, where larger values are the less desirable trait, the  
191 correlations with the number of homozygous derived SNPs are positive. These correlations are  
192 significant with the notable exception of DON and dSNPs (Table 3).

193 The proportion of phenotypic variance explained by all genotypes jointly, also referred to as  
194 “SNP heritability” was estimated using a linear mixed model implemented in GEMMA [46]. The  
195 removal of SNPs with a minimum minor allele frequency (MAF) of  $\leq 1\%$  resulted in the  
196 inclusion of 357 of the 377 SNPs genotyped in all progeny. Heritability estimates for this SNP  
197 set were 0.198 for yield, 0.357 for DON concentration, and 0.237 for height.

198 Among the SNPs directly genotyped in the progeny, three (11\_10196, 11\_20422, and  
199 11\_20777) were identified as contributing to yield with a  $p < 0.01$ . The first SNP had a favorable  
200 effect on yield while the latter two SNPs were associated with reduced yield and with the  
201 favorable trait of reduced DON concentration. All three SNPs are at relative high minor allele  
202 frequencies ( $\sim 0.3 - 0.4$ ) and increase in frequency from C0 to C3. All three occur in  
203 chromosomal regions on 2H and 4H previously identified as under selection in Minnesota barley  
204 breeding lines subject to introgression for increased Fusarium head blight resistance [47]. A

205 region on chromosome 4H (18.7 - 35.8 Mb) contributes six of eight associations with  $p < 0.01$   
206 for DON concentration and overlaps with a region of the genome that [47] demonstrated had  
207 been subject to strong selection for Fusarium resistance. The region covers  $\sim 2.6\%$  of the 647 Mb  
208 of chromosome 4H and includes 110 annotated genes. Fifteen dSNPs were identified in this  
209 interval. For eight dSNPs with unambiguous ancestral state, frequencies were maintained or  
210 increased over breeding cycles, resulting in a mean DAF of 0.60 in C3. The dSNPs were  
211 included in a major haplotype contributed by one of three founders, FEG153-58, FEG154-47, or  
212 FEG175-57, all from the Minnesota breeding program.

213 For linear mixed model analysis using SNPs identified in exome capture, the  $\geq 1\%$  frequency  
214 threshold resulted in retention of 419,956 SNPs (86% of all SNPs). Heritability estimates were  
215 0.250 for yield, 0.514 for DON concentration, and 0.358 for plant height. These values are  
216 consistent with previous estimates: a study of a two-row barley double haploid population grown  
217 across 25 locations reported average yield heritability of 0.35 and plant height of 0.33 [48].  
218 Heritability for DON accumulation has been estimated as 0.46 in a separate study of crosses  
219 between two-row and six-row barley [49].

## 220 **Change in SNP Frequency over Cycles**

221 Using the parental assignment of genomic segments in the progeny, it is possible to track  
222 changes in frequency for segregating variation across various functional classes of SNPs. While  
223 all classes of SNPs became more homozygous over generations, dSNPs are lost from the  
224 population more frequently than synonymous SNPs (Table 4). Out of 37,766 synonymous SNPs  
225 with unambiguous ancestral state (required for dSNPs to infer which variant is likely deleterious)

226 identified in the parents, 30,481 (80.7%) were still segregating in Cycle 3. Of the 1,913 dSNPs  
227 identified with unambiguous ancestral state, 1,278 (66.8%) were segregating in Cycle 3.  
228 However, this measure does not account for lower average derived allele frequencies for dSNPs.  
229 If measured as relative fold change in derived allele frequency, dSNPs are more frequently  
230 decreasing in frequency (Figure 5). The median change in DAF is -0.25 for dSNPs and closer to  
231 zero for all other classes (Table 5). Slightly more than half of variants showed decreased DAF  
232 over breeding cycles, but this trend is observed at 0.627 of dSNPs. When using the pedigree to  
233 establish expectations for the allele frequencies in each cycle, we still observe a preferential loss  
234 of dSNPs as segregating variation (S4 Fig; Table 4). When considering the variants with an  
235 inferred ancestral state, dSNPs have a larger proportion of variants that fix for the ancestral state  
236 than other classes of variants (S6 Fig). Fold change across the genome for individual classes of  
237 variants can be seen in S7 Fig). Of the 1,913 dSNPs with inferred ancestral state, 621 (32.5%)  
238 are fixed for the ancestral allele, while 14.6%, 2.8%, and 2.7% of noncoding, synonymous, and  
239 nonsynonymous SNPs were fixed for the ancestral allele, respectively.

240         The number of homozygous derived dSNPs is reduced in each cycle, but is reduced more  
241 dramatically for the lines selected for yield and reduced DON concentration than for random  
242 chosen lines from the same cycle (Figure 6). In other classes of variants, selected lines tend to  
243 have slightly more homozygous derived variants than random chosen lines; across classes of  
244 SNPs, derived homozygous variants become less frequent over cycles.

245         With regard to homozygous derived dSNPs, the difference in selected and random lines  
246 differed by cycle. For Cycle 1, selected lines had a mean of 224.25 ( $\pm$  22.72) homozygous  
247 dSNPs relative to 229.05 ( $\pm$  22.82) in randomly chosen lines, a difference that was not  
248 significant in a one-sided t-test,  $p = 0.060$ . The dSNP mean homozygosity was a slight decrease

249 from 225.50 ( $\pm$  28.87) homozygous dSNPs in founders in Cycle 0. Selection in Cycle 2 saw  
250 dramatic reduction in DON concentration but little change in yield (Figure 3), [see also41]. In  
251 that generation, selected lines averaged more dSNPs than randomly chosen lines, 225.73 ( $\pm$   
252 19.87) versus 216.34 ( $\pm$  2139). Cycle 3 progeny showed yield improvement, with minimal  
253 change in DON. The difference in selected and random chosen lines for mean dSNPs was large,  
254 with 205.86 ( $\pm$  16.43) versus 218.02 ( $\pm$  15.52), with  $p = 0.00017$  in a one-sided t-test. The  
255 number of homozygous dSNPs over generations changes more dramatically than the dosage of  
256 dSNPs in individual lines (S8 Fig), consistent with effects of dSNPs being primarily recessive.

## 257 **Discussion**

258 We examined the fate of multiple classes of variants in a population subjected to genomic  
259 prediction and selection for two unfavorably correlated quantitative traits over three cycles.  
260 Selection was based on genomic prediction from a genome-wide set of 384 SNPs genotyped in  
261 all progeny. This selection did not make use of any information on functional annotation of  
262 variants. We identify 3,855 putative dSNPs segregating in protein coding regions; most of these  
263 SNPs are at low frequency in the founding parents (Figure 1; S2 Fig) and on average, decrease  
264 slightly in frequency over the course of the experiment (S4 Fig, S5 Fig). The highest yielding  
265 progeny in the population carry fewer dSNPs than progeny drawn at random (Figure 6).

266 Over three cycles of intercrossing and selection, the proportion of dSNPs occurring in the  
267 highest derived frequency class (S4 Fig) or reaching fixation (Table 4) is notably lower than  
268 other classes of SNPs. Taken together, these lines of evidence suggest that dSNPs that contribute  
269 to a diminution of yield are selected against despite the limitations of population size and the  
270 countervailing effects of selection on predicted yield and FHB resistance.

271        Though progeny were selected for both predicted yield and FHB resistance, lines selected  
272 based on genomic breeding value typically have a lower total dosage of dSNPs (including SNPs  
273 in both the heterozygous and homozygous state) (S8 Fig), and fewer dSNPs in the homozygous  
274 state (Figure 6). The reduction in homozygous variants per line is consistent with the majority of  
275 dSNPs constituting recessive, loss of function changes. The reduction in the number of  
276 homozygous dSNPs occurs over successive generations in the experiment, resulting in a  
277 significant negative correlation between both yield and the number of homozygous SNPs,  
278 including dSNPs. A larger number of homozygous derived SNPs is associated with higher DON,  
279 the undesirable state. The correlation of DON concentration and dSNPs is not statistically  
280 significant (Table 3). This is consistent with the expectation that dSNPs are more likely to be  
281 predictive to fitness-related phenotypes such as yield [16,30,34]. Plant height was not under  
282 selection, but increasing plant height is generally not desirable. It was positively correlated with  
283 the number of homozygous derived SNPs (Table 3).

284        The barley genome includes large pericentromeric regions with minimal crossover [42,43]  
285 (S3 Figure). Based on our exome capture resequencing, these regions harbor fewer dSNPs per  
286 codon than the distal arms of chromosomes (Figure 2). This should not be taken as evidence that  
287 linked selection in these regions is unimportant, but rather that gene density plays an important  
288 role in determining the distribution of dSNPs within coding regions. Previous studies have  
289 suggested dSNPs occur at a higher frequency in lower recombination regions of the genome in  
290 sunflower [26], rice [15,19], and soybean [25]. Evidence for this phenomenon in maize is mixed,  
291 with no evidence for higher mutational load reported by [31] whereas it was identified by [50].  
292 Comparison among studies is made more difficult by differences in approaches for dSNP  
293 annotation and the sequence diversity statistics used as a point of comparison (e.g., density of

294 synonymous SNPs) [see 20,19]. There may also be a weaker relationship between recombination  
295 and diversity in predominantly self-fertilizing species [51]. An implication is that for barley, and  
296 perhaps other species, the majority of dSNPs occur in genomic regions where crossover rates are  
297 relatively high. Thus many dSNPs can potentially be removed from populations based on the  
298 action of crossover and independent assortment.

299 This study involved simultaneous prediction and selection on two quantitative traits that are  
300 unfavorably correlated. This represents a somewhat realistic scenario for many applications of  
301 genomic prediction. Based on linear mixed model analysis of marker-trait association, we  
302 identified a 17.1 Mb region on chromosome 4H that contributed to reduced disease severity but  
303 also had negative impacts on yield. This region had been previously identified in a selection  
304 mapping study for FHB resistance [47]. Selection for variants in this region contributed to  
305 improved disease resistance but also provided the opportunity for at least 15 identified dSNPs to  
306 be maintained in the population. For eight of those variants where the derived (and likely  
307 deleterious state) is unambiguous, there is evidence of hitchhiking to higher frequencies.

308 The identification and weighting of deleterious variants in a genomic prediction framework  
309 appears to be promising path for improving phenotypic prediction [27,34]. While we observed  
310 little difference in the number of dSNPs per line, the number of private dSNPs varied  
311 dramatically, providing the opportunity to select progeny with fewer rare and potentially  
312 deleterious variant than either parent. It should be noted that the fitness effects of individual  
313 deleterious variants in crops remains largely unknown and indeed, the shape of the distribution  
314 of fitness effects of all variants is a challenging quantity to estimate [52,53]. The proportion of  
315 variants with large effects on fitness could impact genomic prediction strategies. As with any  
316 examination of a complex trait, sample sizes for phenotyped individuals are likely to limit power

317 to detect effects among classes of variants. Also, because deleterious variants are completely  
318 commingled with other classes of variants, limits on recombination within a population limit the  
319 degree to which the effects of deleterious variants can be isolated. Given these caveats, the  
320 potential to readily identify a class of fitness-related variants that can be subject to selection  
321 holds considerable promise for phenotypic prediction.

## 322 **Materials and Methods**

### 323 **Population Design**

324 Our experimental population consists of spring, six-row, malting barley adapted to the Upper  
325 Midwest of the United States. Three breeding programs (Busch Agricultural Resources, Inc.,  
326 North Dakota State University, and University of Minnesota) contributed the 21 founders of the  
327 population, denoted as Cycle 0 (C0) (S1 Table; S1 Figure). Founders were used to produce 45  
328 crosses (pedigrees available at <http://conservancy.umn.edu/XXXX>). F<sub>1</sub> progeny from each of the  
329 crosses were self-fertilized to the F<sub>3</sub> generation, resulting in 1,080 F<sub>3</sub> progeny, denoted as Cycle  
330 1 (C1). A total of 98 lines were selected from C1 based on genomic estimated breeding value  
331 (GEBV) and randomly intercrossed to generate the next cycle of progeny. Training populations  
332 used for genomic prediction and approaches for updating those populations are detailed in [41].  
333 The progeny from the intercrosses among selected lines were selfed to the F<sub>3</sub> generation. The  
334 process of line selection, intercrossing, and inbreeding, was repeated, creating three cycles of  
335 selection using genomic prediction. The total number of lines selected for C2 was 105, and the  
336 total number of lines selected for C3 was 48 (S1 Fig). Breeding program progress was evaluated  
337 by phenotypic comparison of the selected lines to a random subset of lines from each cycle. The

338 numbers of randomly selected lines were 300, 101, 49 from C1, C2, and C3, respectively (S1  
339 Fig).

340 Selection was based on the predicted phenotypic values for grain yield and for reduced  
341 fungal disease severity using a proxy phenotype, the concentration of the mycotoxin,  
342 deoxynivalenol (DON) which is created during an active *Fusarium* infection [41]. GEBV  
343 prediction was based on 384 SNPs evenly distributed across the seven barley chromosomes and  
344 chosen to maximize marker informativeness among the founders. Genotyping used an Illumina  
345 Veracode assay [41]. Lines were selected for increased yield and reduced DON concentration.  
346 GEBVs were estimated with ridge regression, as implemented in the ‘rrBLUP’ package [54] for  
347 R [55].

## 348 **Phenotypic Data Collection**

349  $F_{3:5}$  breeding lines in the selected and random pools for Cycles 1-3 were evaluated in yield  
350 trials at five year-locations. Phenotypic data was collected on grain yield and DON  
351 concentration. Phenotypic data were spatially adjusted with a moving average across the field  
352 plots. Best linear unbiased estimates (BLUEs) for yield and DON concentration were then  
353 produced for each line using the ‘rrBLUP’ package for R.

354 Raw and adjusted phenotypic data, including planting locations in the field trials, are  
355 available at [https://github.com/MorrellLAB/Deleterious\\_GP](https://github.com/MorrellLAB/Deleterious_GP) and  
356 <http://conservancy.umn.edu/XXXX>. For details of phenotypic data collection see [see 41].



## 357 **Genotypic Data Collection**

358 A total of 5,215 F<sub>3</sub> progeny were genotyped across the three cycles using the 384 SNPs from  
359 the barley oligo pooled assay (BOPA) marker panel [56]. The physical location of all SNPs were  
360 determined based on automated BLAST searches against the barley reference genome [43],  
361 using consensus genetic map position to resolve ambiguous positions [57]. A small number of  
362 SNPs were missing either a genetic or physical position. For these SNPs we use linear  
363 interpolation as described in the [S2 Appendix].

364 Genotypes were called using signal to noise ratios from the raw probe intensities, as  
365 implemented in machine-scoring algorithm ALCHEMY [58]. ALCHEMY was used for  
366 genotype calls because it does not rely on clustering of samples to identify genotypic classes,  
367 thus avoiding Hardy-Weinberg equilibrium genotype frequency assumptions, and makes use of a  
368 prior estimate of the inbreeding coefficient to model the number of expected heterozygous  
369 genotypes. The prior inbreeding coefficient was specified as 0.99 for parental lines and as 0.75  
370 for the F<sub>3</sub> progeny, the average expected inbreeding coefficient after two generations of self-  
371 fertilization. Genotyping data was transformed to PLINK 1.9 format [59], and included pedigree  
372 information for each individual (data available at <http://conservancy.umn.edu/XXXX>). PLINK  
373 was used to test for Mendelian errors in inheritance of SNPs and to orient SNPs on the  
374 appropriate strand relative to the barley reference genome sequence from the cultivar Morex  
375 [43]. SNP genotypes from the barley BOPA markers genotyped in the Morex X Steptoe genetic  
376 mapping population [60,61] were used to infer the reference strand of origin for each SNP. The  
377 “hybrid peeling” approach of [45] was used for simultaneous imputation and phasing of  
378 genotyping data and thus to infer the parental contribution of chromosomal segments to progeny.

379 The approach of [45] makes use of an extended pedigree so that phased genotype inference is  
380 improved by comparisons to both progenitors and progeny. The specified pedigree is available at  
381 [https://github.com/MorrellLAB/Deleterious\\_GP/blob/master/Data/Pedigrees/AlphaPeel\\_Pedigree](https://github.com/MorrellLAB/Deleterious_GP/blob/master/Data/Pedigrees/AlphaPeel_Pedigree)  
382 [e.txt](#). PLINK was used for a second round of Mendel error checking with imputed genotypes.  
383 Imputed genotypes in progeny were set to missing if their genotype probability was less than 0.7.

## 384 **DNA Extraction, Sequence Analysis, and Variant Calling**

385 DNA was extracted from young leaf tissue from each of the 21 founder lines using the Plant  
386 DNAzol extraction reagent and protocol from Thermo Fisher Scientific (Waltham, MA).  
387 Genomic DNA was captured with liquid phase exome probes designed to capture 60 Mb of the  
388 barley genome [62]. Eighteen of the samples were sequenced with 100 bp paired end technology  
389 on an Illumina HiSeq2000, and three were sequenced with 125 bp paired end technology on an  
390 Illumina HiSeq2500. Exomes were sequenced to a target depth of 30-fold coverage. Raw  
391 FASTQ files were cleaned of 3' sequencing adapter contamination with Scythe  
392 (<https://github.com/vsbuffalo/scythe>), using a prior on contamination rate of 0.05. Adapter  
393 trimmed reads were then aligned to the Morex pseudo-molecule assembly ([http://webblast.ipk-](http://webblast.ipk-gatersleben.de/registration/)  
394 [gatersleben.de/registration/](http://webblast.ipk-gatersleben.de/registration/)) with BWA-MEM [63]. Mismatch and alignment reporting  
395 parameters were tuned to allow for approximately three high-quality mismatches between the  
396 reads and the reference. This represents approximately the highest observed coding sequence  
397 diversity in barley [64,65]. BAM files were cleaned of unmapped reads, split alignments, and  
398 sorted with SAMtools version 1.3 [66]. Duplicate reads were removed with Picard version 2.0.1  
399 (<http://broadinstitute.github.io/picard/>).

400 Alignment processing followed the Genome Analysis Toolkit (GATK) best practices  
401 workflow [67,68]. Cleaned BAM alignments were realigned around putative insertion/deletion  
402 (indel) sites. Individual sample genotype likelihoods were then calculated with the  
403 HaplotypeCaller, with a haploid model and “heterozygosity” value of 0.008 per base pair. This  
404 value is the mean estimate of coding nucleotide sequence diversity, based on previous Sanger  
405 resequencing experiments [65,69]. SNP calls were made from the genotype likelihoods with the  
406 GATK tool GenotypeGVCFs [68].

407 Estimates of read depth and coverage made use of ‘bedtools genomecov’ relative to an  
408 empirical estimate of exome coverage. Briefly, estimated exome coverage was based on BWA-  
409 MEM mapping of roughly 241-fold exome capture reads from the reference barley line Morex  
410 (SRA accession number ERR271711), against the Morex draft genome. Read mapping was  
411 performed using the same parameters as for mapping the reads from the parental varieties against  
412 the reference assembly. Regions covered by at least 50 reads were considered covered by exome  
413 capture. Intervals that were separated by 50 bp or fewer were joined into a single interval. This  
414 results in ~80 Mb of exome coverage relative to the 60 Mb based on capture probe design [62].  
415 Recombination rate in cM/Mb was estimated based on physical positions of SNPs in the  
416 reference genome [43] and the estimated crossover rate from the consensus genetic map of [61].

417 Scripts to perform adapter contamination removal, read mapping, alignment cleaning, and  
418 implementing the GATK best practices workflow are available at  
419 [https://github.com/MorrellLAB/Deleterious\\_GP](https://github.com/MorrellLAB/Deleterious_GP). The BED file describing the empirical estimate  
420 of capture coverage is also available at the provided GitHub link and at  
421 <http://conservancy.umn.edu/XXXX>.

## 422 **Inference of Ancestral State Using an Outgroup Sequence**

423 Whole genome resequencing data for *Hordeum murinum* ssp. *glaucum* was collected using  
424 Illumina paired end 150 bp reads on a NextSeq system. We chose *H. murinum* ssp. *glaucum* for  
425 ancestral state inference because phylogenetic analyses have placed this diploid species in a  
426 clade relatively close to *H. vulgare* [70]. Previous comparison of Sanger and exome capture  
427 resequencing from the most closely related species, *H. bulbosum*, identified shared  
428 polymorphisms at a proportion of SNPs, resulting in ambiguous ancestral states [65,65]. After  
429 adapter trimming, sequencing reads from *H. murinum* ssp. *glaucum* were mapped to the Morex  
430 reference genome using Stampy version 1.0.31 [44], with prior divergence estimates of 3%, 5%,  
431 7.5%, 9%, and 11%. Cleaned BAM files were generated using Samtools version 1.3.1 [66] and  
432 Picard version 2.1.1 (<http://broadinstitute.github.io/picard>) and realigned around  
433 insertion/deletions (indel) using GATK version 3.6. A *H. murinum* ssp. *glaucum* FASTA file  
434 was created using ANGSD/ANGSD-wrapper [71,72]. Inference of ancestral state for SNPs in  
435 this set of 21 parents was performed using a custom Python script. For the above sequence  
436 processing pipeline, the following steps were performed using `sequence\_handling` [73] for  
437 quality control, adapter trimming, cleaning BAM files, and coverage summary. All other steps  
438 for processing *H. murinum* ssp. *glaucum* and inferring ancestral state are available on GitHub  
439 ([https://github.com/liux1299/Barley\\_Outgroups](https://github.com/liux1299/Barley_Outgroups)).

## 440 **Deleterious Predictions**

441 Variant annotation, including the identification of nonsynonymous variants used gene models  
442 provided by [43]. Annotations were applied to the reference genome using ANNOVAR [74].  
443 Nonsynonymous SNPs were tested with three prediction approaches: PROVEAN [75],

444 Polymorphism Phenotyping 2 (PPH2) [76], and BAD\_Mutations [25,77] which implements a  
445 likelihood ratio test for neutrality [22]. All three approaches use phylogenetic sequence  
446 constraint to predict whether a base substitution is likely to be deleterious. PROVEAN and PPH2  
447 used BLAST searches against the NCBI non-redundant protein sequence database, current as of  
448 30 August, 2016. BAD\_Mutations was run with a set of 42 publicly available Angiosperm  
449 genome sequences, hosted on Phytozome (<https://phytozome.jgi.doe.gov>) and Ensembl Plants  
450 (<http://plants.ensembl.org/>). A SNP was considered deleterious by PROVEAN if the substitution  
451 score was less than or equal to -4.1528, as determined by calculating 95% specificity from a set  
452 of known phenotype-altering SNPs in *Arabidopsis thaliana* [77]. PPH2 classifies SNPs as  
453 neutral or deleterious; prediction was considered as deleterious if it output a ‘deleterious’ call for  
454 a SNP. These programs use a heuristic for testing evolutionary constraint, as well as a training  
455 model for known human disease-causing polymorphisms. A SNP was considered deleterious by  
456 BAD\_Mutations if the  $p$ -value from a logistic regression [24] was less than 0.05. The logistic  
457 regression model used for dSNP identification is an update to the BAD\_Mutations  
458 implementation reported by [24]. For comparative analyses, nonsynonymous SNPs were  
459 considered to be deleterious if they were identified as deleterious by all three approaches, or if  
460 they form an early stop codon (nonsense SNP).

## 461 **Population Summary Statistics**

462 Pairwise diversity across classes of SNPs was calculated using VCFTools and diploid  
463 genotypes for each individual. Calculations were partitioned across breeding cycles and among  
464 functional classes including noncoding, synonymous, nonsynonymous, and deleterious. For

465 progeny in C1-C3, calculations made use of imputed genotypes relative to the transmission of  
466 the 384 SNP genotyping for each partition and functional class.

467 For SNP genotyping, the expected number of segregating markers in each family was  
468 calculated based on the pedigree and based on SNPs that were polymorphic within families  
469 based on parental genotypes.

470 Testing for segregation distortion at individual SNPs used the parental genotypes and the  
471 pedigrees to generate the expected number of genotypes. The observed numbers of each  
472 genotypic class in each cycle were calculated with PLINK. Observed genotype counts were  
473 tested for significant departure from Mendelian expectations using Fisher's Exact Test,  
474 implemented in the R statistical computing environment [55].

## 475 **Proportion of Phenotypic Variance Explained**

476 The proportion of phenotypic variance that could be explained from the genotyping data was  
477 estimated using linear mixed model approach as implemented in the program Genome-wide  
478 Efficient Mixed Model Association (GEMMA) [46]. The model incorporates estimated a identity  
479 matrix among samples that controls for family structure. We estimated the phenotypic variance  
480 explained for three phenotypes, yield, DON concentration, and plant height, using spatially  
481 adjusted BLUP (or BLUE) estimates averaged across years and locations as reported by [41].  
482 The mixed model analysis involved a minimum minor allele frequency of 1% in the phenotyping  
483 panel. Heritability was estimated for SNPs from the 384 SNP Veracode panel and for SNPs  
484 imputed from parents to progeny based on exome capture resequencing.

## 485 **Acknowledgements**

486 The authors are also grateful to Ana Poets and Tyler Tiede for sharing computer code used in  
487 data analysis. We are grateful to Maria Muñoz-Amatriaian and Timothy Close for providing SNP  
488 genotyping data from barley genetic mapping populations that included the variety Morex, used  
489 for the reference genome. We are grateful to Shiaoman Chao for provided barley genotyping raw  
490 data. Sebastian Beier provided physical positions for a portion of genotyped SNPs. Li Lei, Yong  
491 Jiang, Jochen Reif, Albert Schulthess, Ruth Shaw, Robert Stupar, Peter Tiffin, and Yusheng  
492 Zhao provided valuable comments on an earlier version of the text. This research was carried out  
493 with hardware and software support provided by the Minnesota Supercomputing Institute (MSI)  
494 at the University of Minnesota.

495

## 496 **Funding**

497 We acknowledge financial support from United States National Science Foundation grants  
498 IOS-1339393, the Minnesota Agricultural Experiment Station Variety Development fund, and a  
499 University of Minnesota Doctoral Dissertation Fellowship in support of TJYK. The funders had  
500 no role in study design, data collection and analysis, decision to publish, or preparation of the  
501 manuscript.

## 502 **Data Availability Statement**

503 All raw sequence reads for barley parental lines are available as BioProject ID  
504 PRJNA399170. Raw reads for *Hordeum murinum* ssp. *glaucum* are available as BioProject ID  
505 PRJNA491526. Additional files including a variant call format (VCF) file of variants called in  
506 all parents, and empirical estimate of exome capture coverage, and all available genotypes and  
507 phenotypes are in a Data Repository University of Minnesota (DRUM) archive at  
508 <http://conservancy.umn.edu/XXXX>. Scripts used for analysis are available at  
509 [https://github.com/MorrellLAB/Deleterious\\_GP](https://github.com/MorrellLAB/Deleterious_GP). All other relevant data is found in the paper and  
510 its Supporting Information files.

## 511 512 **Author Contributions**

513 **Conceptualization:** Thomas J. Y. Kono, Justin C. Fay, Kevin P. Smith, Peter L. Morrell

514 **Data curation:** Thomas J. Y. Kono, Emily E. Vonderharr, Daniel Koenig, Kevin P. Smith, Peter  
515 L. Morrell

516 **Formal analysis:** Thomas J. Y. Kono, Chaochih Liu, Peter L. Morrell

517 **Funding acquisition:** Justin C. Fay, Kevin P. Smith, Peter L. Morrell

518 **Investigation:** Thomas J. Y. Kono, Kevin P. Smith, Peter L. Morrell

519 **Methodology:** Thomas J. Y. Kono, Justin C. Fay, Peter L. Morrell

520 **Project administration:** Justin C. Fay, Kevin P. Smith, Peter L. Morrell

521 **Resources:** Daniel Koenig, Kevin P. Smith, Peter L. Morrell

522 **Software:** Thomas J. Y. Kono, Chaochih Liu, Justin C. Fay, Peter L. Morrell

523 **Supervision:** Justin C. Fay, Peter L. Morrell

524 **Validation:** Thomas J. Y. Kono, Chaochih Liu, Emily E. Vonderharr, Peter L. Morrell



525 **Visualization:** Thomas J. Y. Kono, Peter L. Morrell

526 **Writing – original draft:** Thomas J. Y. Kono, Chaochih Liu, Justin C. Fay, Peter L. Morrell

527 **Writing – review & editing:** Thomas J. Y. Kono, Chaochih Liu, Emily E. Vonderharr, Daniel  
528 Koenig, Justin C. Fay, Kevin P. Smith, Peter L. Morrell

529

## 530 Figures

531 Figure 1

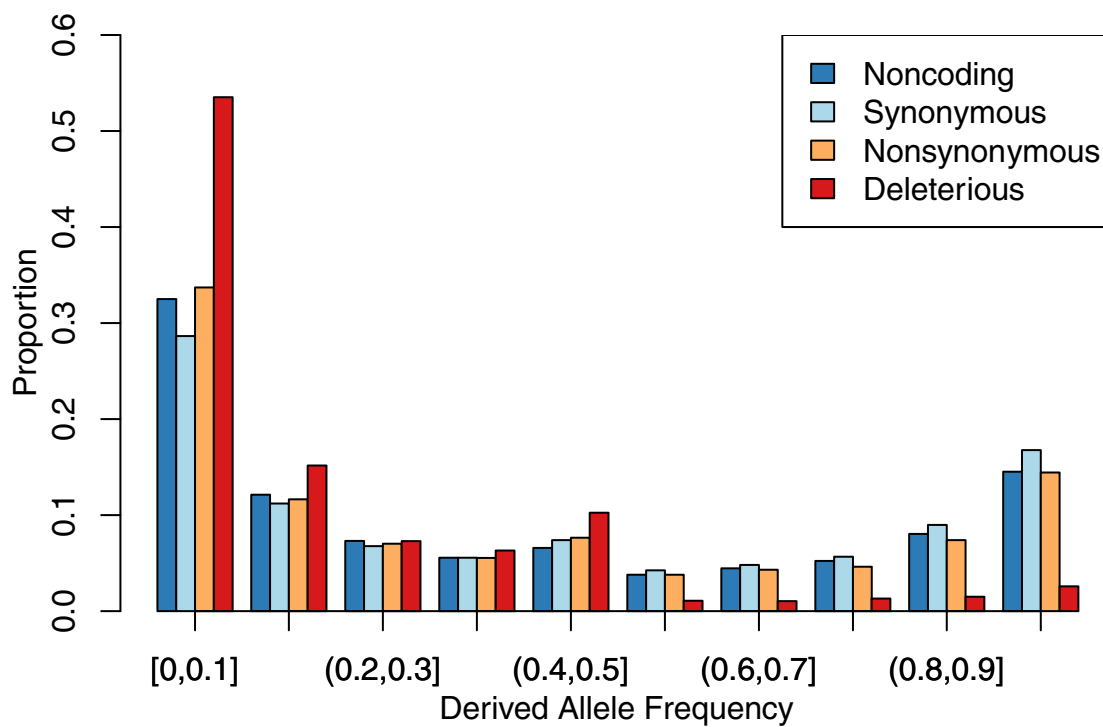

532

533

534 Figure 2

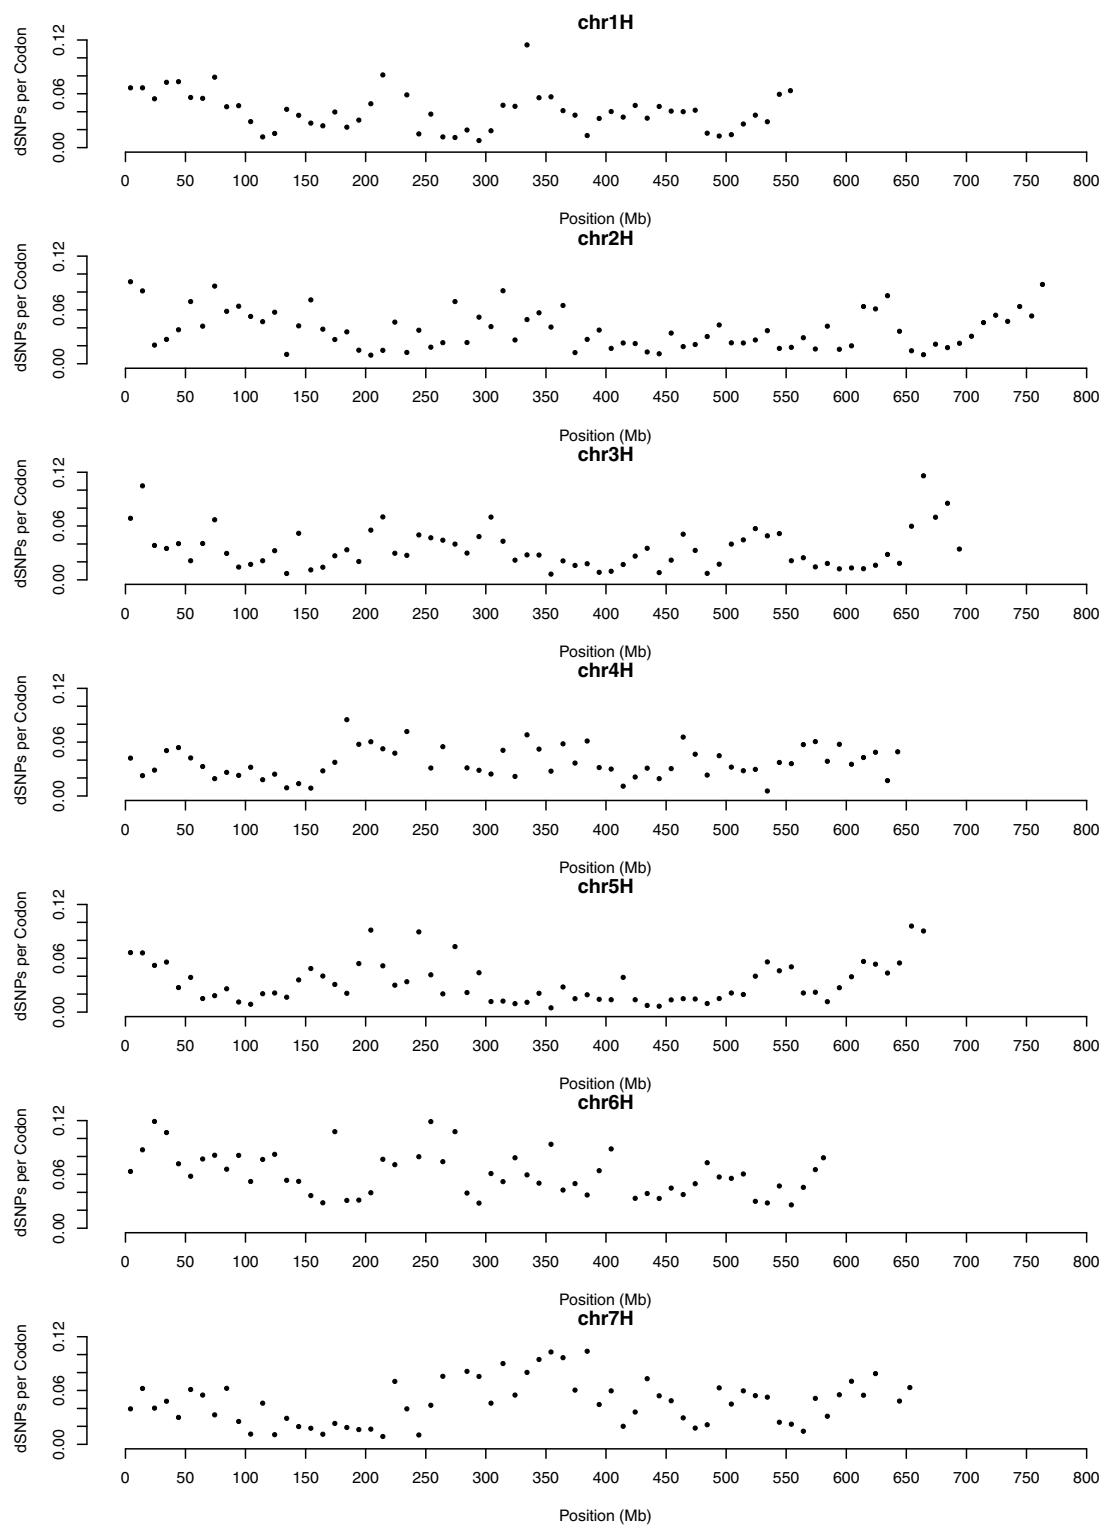

535

536

537 Figure 3

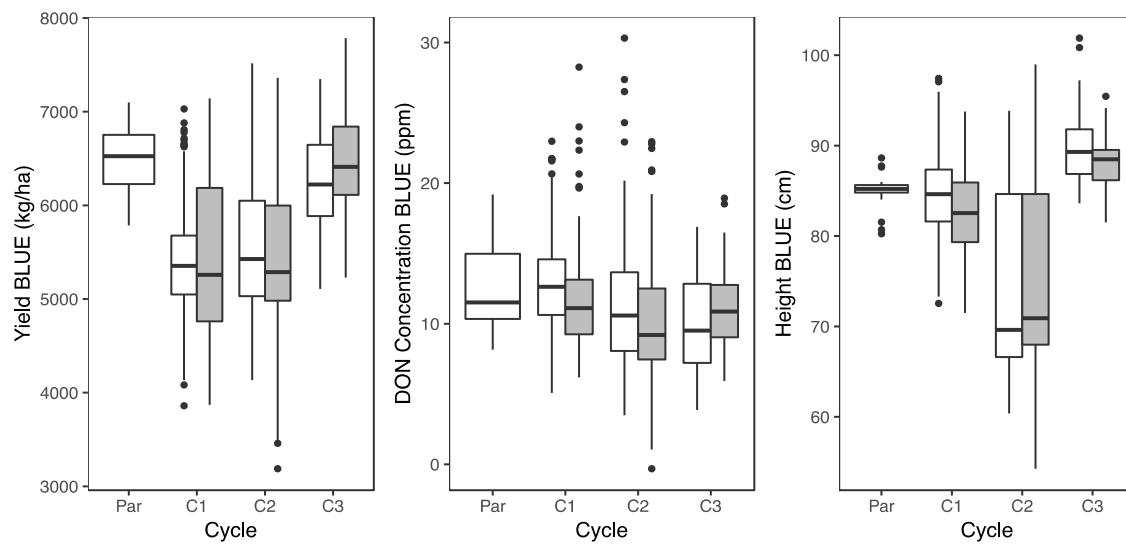

538

539

540 Figure 4

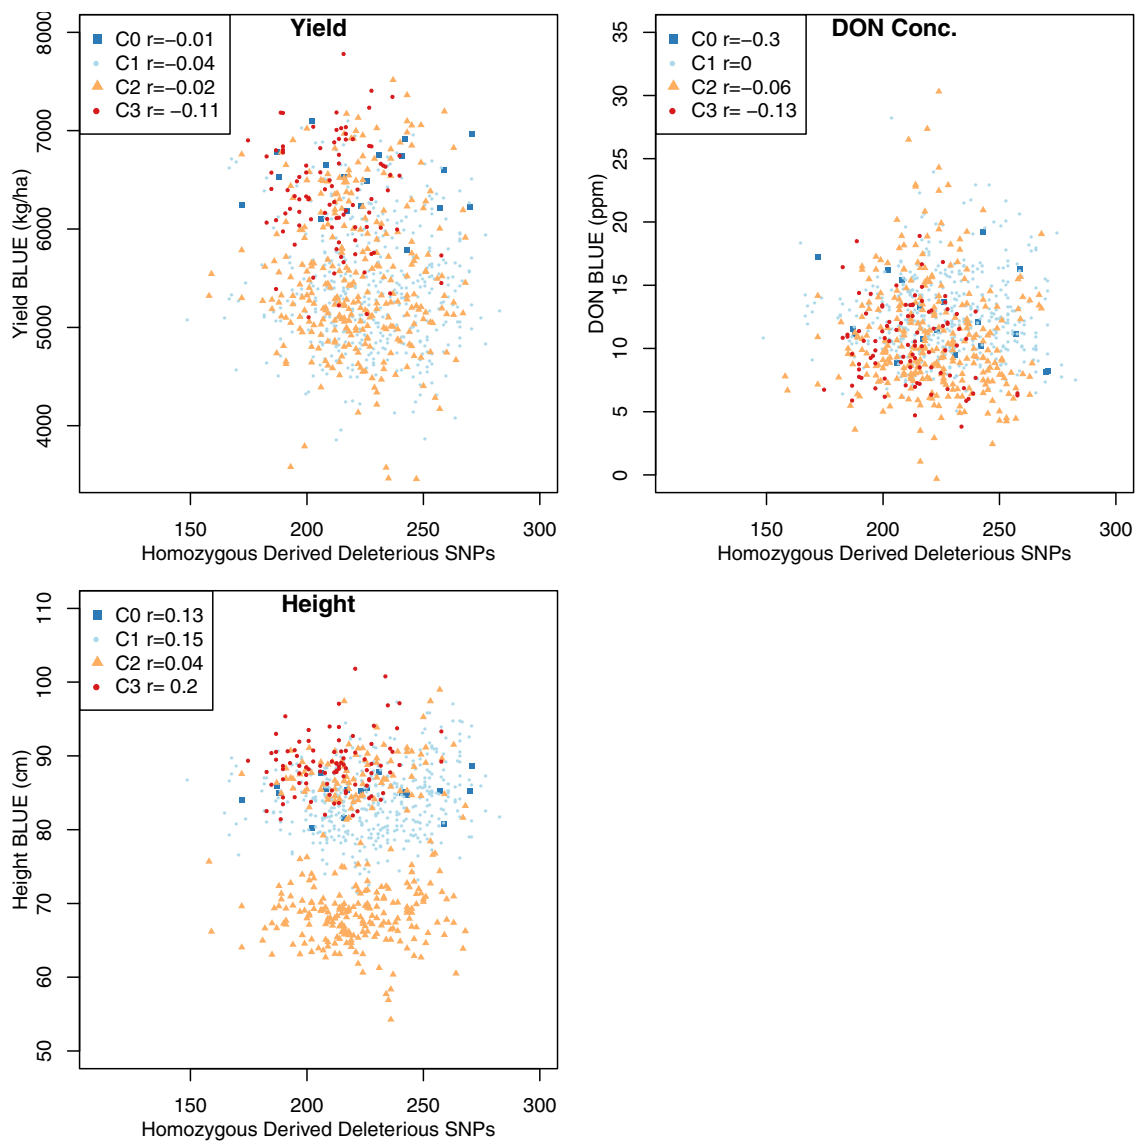

541

542

543 Figure 5

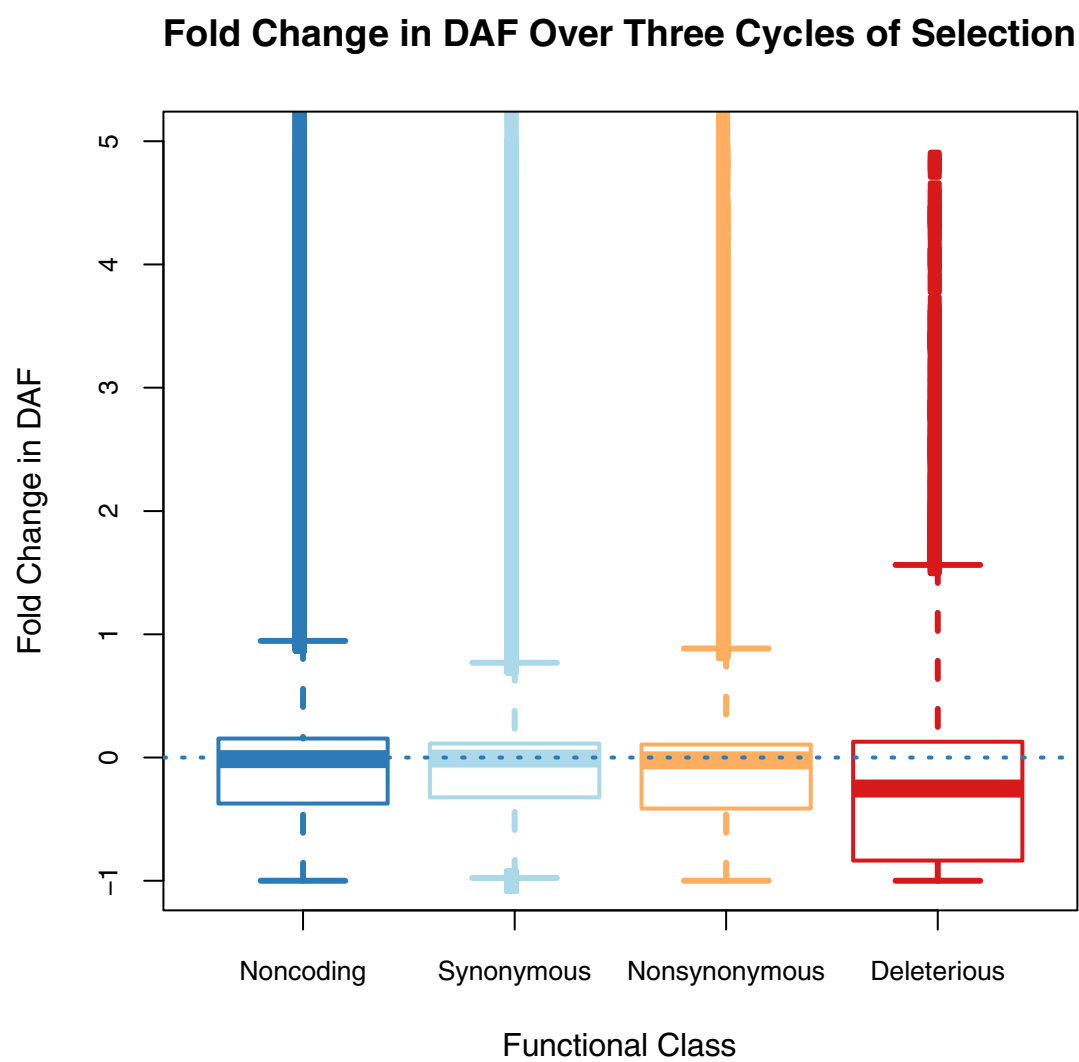

544

545

546 Figure 6

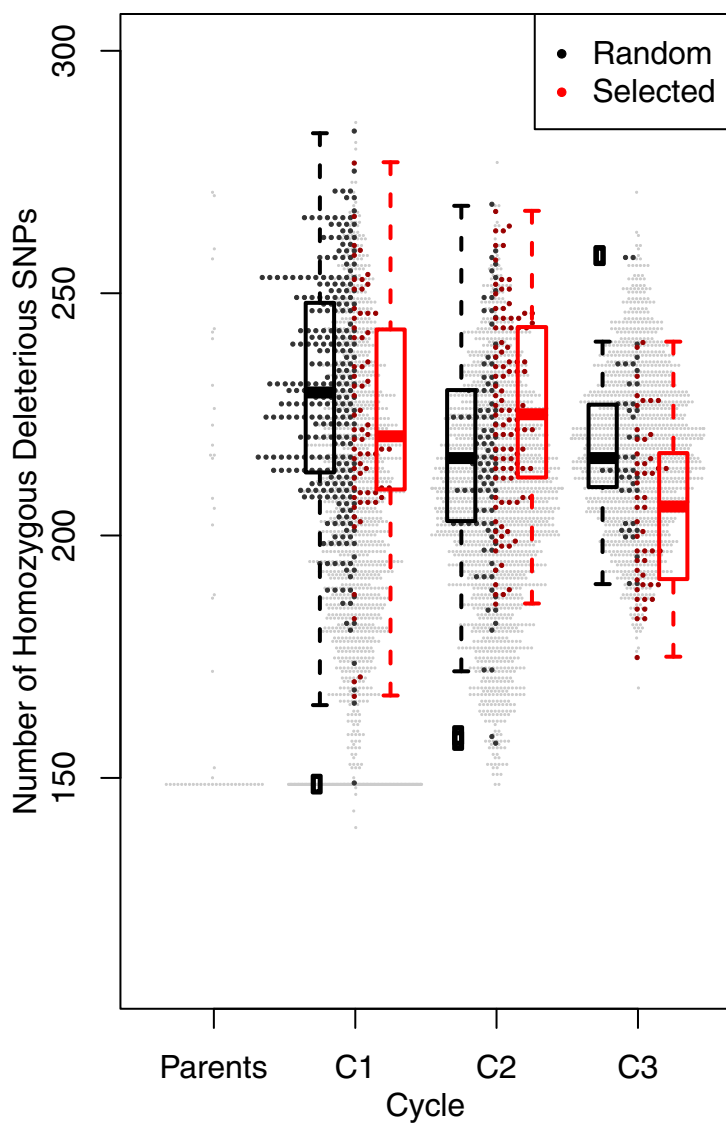

547

548

549

## 550 **Figure Legends**

551 Figure 1. Derived site frequency spectra, for 283,021 SNPs in the parental founders of the  
552 genomic prediction population. Ancestral state was based on majority state from *Hordeum*  
553 *murinum* spp. *glaucum* resequencing mapped to the Morex assembly. (For all SNPs, including  
554 those with no inferred ancestral state see Figure S2.) “Noncoding” refers to SNPs in regions that  
555 do not code for proteins, “Synonymous” refers to SNPs in coding regions that do not alter an  
556 amino acid sequence, and “Nonsynonymous” refers to SNPs that alter the amino acid sequence.  
557 SNPs listed as “Deleterious” are the intersect of variants that annotate as deleterious in each of  
558 three approaches.

559 Figure 2. The number of dSNPs per covered codon in 1Mb windows across the barley genome.  
560 The light grey shading shows the pericentromeric region, and the dark grey shading show the  
561 centromere.

562 Figure 3. Plots of yield (A) and DON concentration (B) and plant height (C) data collected on the  
563 experimental population. Values for check lines, founding parents (Cycle 0), and each of three  
564 cycles are shown (C1 - C3). In C1 - C3, randomly selected lines are shown in white, and lines  
565 selected based on genomic estimated breeding dvalues are shown in grey. Data shown is the  
566 linear unbiased estimates (BLUEs) for individual lines based on yield, DON, and plant height  
567 observations at five year-locations.

568 Figure 4. The number of homozygous dSNPs in each cycle of the experiment compared to the  
569 BLUE for yield, DON concentration, and plant height. Values are shown for Cycle 0 to Cycle 3.



570 Figure 5. The fold change in derived allele frequency (DAF) in SNPs from four classes of  
571 variants. The nonsynonymous class includes only SNPs determined to be ‘tolerated’ based on  
572 deleterious variant annotation.

573 Figure 6. Number of dSNPs in the homozygous state in parents and progeny over three breeding  
574 cycles, C1 - C3. Values for all individuals are shown, with random samples in C1 - C3 in black  
575 and selected samples in red. Boxplots summarize the data for each partition of samples.

576

577

578 S1 Fig. A schematic of the barley genomic prediction population used in this study.

579 S2 Fig. The folded site frequency spectra (SFS) for all SNPs in the parental founders and three  
580 cycles of progeny in the genomic prediction population. The SFS for progeny is imputed relative  
581 to genotyped SNPs. SNPs are partitioned by functional classes.

582 S3 Fig. Exome capture target density (dark blue line), recombination rate in cM/Mb (green line),  
583 and the genomic distribution of SNPs identified in the parental varieties (vertical light blue  
584 lines). Purple triangles indicate SNPs genotyped in parents and progeny. Exome capture target  
585 density is the number of exome capture targets per 100kb. Recombination rate estimates are  
586 derived from the genetic map of [61], and Lowess-smoothed in windows of 3Mb, using 2% of  
587 the points in each window for smoothing.

588 S4 Fig. The derived site frequency spectrum (SFS) for all sites with estimated ancestral state  
589 based on imputed genotypes relative to genotyped SNPs in progeny for each cycle. SNPs are  
590 partitioned by functional classes.

591 S5 Fig. The folded site frequency spectrum (SFS) for all imputed variants in all cycles. SNPs are  
592 partitioned by functional classes.

593 S6 Fig. Proportion of variants that fixed for ancestral states in C3 at various initial frequencies in  
594 the founders. Variants are partitioned by functional class.

595 S7 Fig. Fold change in derived allele frequency for all variants with unambiguous ancestral  
596 states from C1 to C3 across the genome. Grey shading indicates pericentromeric regions.

597 S8 Fig. Average burden of dSNPs carried by each individual in the population, measured as  
598 number of derived alleles at all identified deleterious sites.

599

## 600 **Tables**

601 Table 1. Summary of SNPs identified in exome capture resequencing of parental accessions.

| <b>Type of Variation</b>   | <b>Count</b> |
|----------------------------|--------------|
| SNP                        | 497,754      |
| SNPs on Barley Chromosomes | 407,285      |
| Coding SNP                 | 119,137      |
| Nonsynonymous SNP          | 62,826       |
| Early Stop Codon           | 1,187        |
| BAD_Mutations Deleterious  | 18,071       |
| PPH2 Deleterious           | 13,922       |
| PROVEAN Deleterious        | 5,892        |
| Intersect of Deleterious   | 3,855        |

602

603 Table 2. The number of private SNPs per population across three classes of genic variants.

| <b>Breeding Program</b> | <b>Synonymous</b> | <b>Nonsynonymous</b> | <b>Deleterious</b> |
|-------------------------|-------------------|----------------------|--------------------|
| <b>Busch Ag</b>         | 3,578             | 3,906                | 271                |
| <b>Minnesota</b>        | 7,930             | 9,031                | 500                |
| <b>North Dakota</b>     | 13,581            | 15,166               | 1,019              |

604

605 Table 3. The correlation between the number of homozygous derived genotypes and the  
606 phenotypes across each functional class of variants.

| <b>Class</b>  | <b>Yield</b> | <b>Yield <i>p</i>-value</b> | <b>DON</b> | <b>DON <i>p</i>-value</b> | <b>Height</b> | <b>Height <i>p</i>-value</b> |
|---------------|--------------|-----------------------------|------------|---------------------------|---------------|------------------------------|
| Noncoding     | -0.081       | 0.0169                      | 0.0860     | 0.0113                    | 0.1090        | 0.0013                       |
| Synonymous    | -0.061       | 0.0706                      | 0.0992     | 0.0034                    | 0.0893        | 0.0083                       |
| Nonsynonymous | -0.075       | 0.0277                      | 0.0859     | 0.0112                    | 0.1009        | 0.0028                       |
| Deleterious   | -0.018       | 0.0014                      | 0.0109     | 0.7486                    | 0.7470        | 0.0273                       |

607

608 Table 4. The proportion of variants in the founding parents from each functional class that were  
 609 lost, segregating, or fixed in progeny in Cycle 03.

| <b>Class</b>  | <b>Segregating</b> | <b>Lost</b> | <b>Fixed</b> |
|---------------|--------------------|-------------|--------------|
| Noncoding     | 120,289            | 22,083      | 6,774        |
| Synonymous    | 30,481             | 5,282       | 2,003        |
| Nonsynonymous | 25,633             | 6,047       | 1,610        |
| Deleterious   | 1278               | 621         | 14           |

610

611

612

613

614 Table 5. The change in SNP frequency by class. Nonsynonymous includes SNPs that are amino  
 615 acid-changing but are annotated as “tolerated.” The values reported are the median change in  
 616 derived allele frequency (DAF), and the proportions of SNPs increasing or decreasing over the  
 617 three breeding cycles.

| <b>Class</b> | <b>Median Change in DAF</b> | <b>Increasing</b> | <b>Decreasing</b> |
|--------------|-----------------------------|-------------------|-------------------|
|--------------|-----------------------------|-------------------|-------------------|

|               |         |       |       |
|---------------|---------|-------|-------|
| Noncoding     | -0.0125 | 0.460 | 0.527 |
| Synonymous    | -0.0075 | 0.465 | 0.519 |
| Nonsynonymous | -0.0220 | 0.439 | 0.543 |
| Deleterious   | -0.2510 | 0.343 | 0.627 |

618

## 619 **Supplemental Materials**

### 620 **S1 Appendix – Yield Trials**

621 For yield trials in 2014, lines were evaluated at Crookston, MN; Morris, MN; and Saint Paul,  
622 MN. For 2015 yield trials, lines were evaluated at Crookston and Morris. Lines were grown in an  
623 augmented block design [78]. The check varieties were to adjust for spatial variation across trial  
624 plots. Checks included ‘Lacey’ (96 replicates), ‘Quest’ (24 replicates), ‘Stellar-ND’ (20  
625 replicates), and ‘Tradition’ (20 replicates).

626 For DON concentration trials, each chosen  $F_{3;5}$  line was evaluated at five year-locations in  
627 disease nurseries [79]. Similar to the yield trials, lines were grown in an augmented block design.  
628 DON concentration was evaluated at Crookston, MN in 2013, 2014, and 2015. DON  
629 concentration was evaluated at Saint Paul, MN in 2013 and 2014. Check varieties for DON trials  
630 were ‘Quest’ (123 replicates), ‘ND20448’ (26 replicates), ‘Tradition’ (25 replicates), and ‘Lacey’  
631 (25 replicates).

## 632 S2 Appendix – Linear Interpolation of Genetic and Physical SNP Positions

633 Among the 384 SNPs on the Veracode assay, two were missing genetic positions and 14  
634 were missing physical positions. To interpolate genetic or physical positions, we use the  
635 positions of flanking SNPs. We take half the distance between known positions. In the formulas,  
636 D is average distance, G is genetic distance, P is physical distance, and the subscripts k and u  
637 refer to known and unknown positions and subscripts 1 and 2 refer to positions up and  
638 downstream of the position to be interpolated.

---

### 639 Unknown genetic position

$$\begin{aligned} 640 \quad D &= (P_2 - P_k) / (P_2 - P_1) \\ 641 \quad G_u &= G_2 - D * (G_2 - G_1) \\ 642 \quad \text{if } G_u = G_2; G_u &= (G_2 - G_1)/2 \end{aligned}$$

---

### 643 Unknown physical position

$$\begin{aligned} 644 \quad D &= (G_2 - G_k) / (G_2 - G_1) \\ 645 \quad P_u &= P_2 - D * (P_2 - P_1) \\ 646 \quad \text{if } P_u = P_2; P_u &= (P_2 - P_1)/2 \end{aligned}$$

647

648

649 S1 Table. Founder parents used in the genomic prediction experiment along with exome capture

650 resequencing summaries.

| Program | Accession Name | Median mapped coverage | Sequence Read Archive # | Sequence Read Length | # of Reads |
|---------|----------------|------------------------|-------------------------|----------------------|------------|
| BuschAg | 6B01-2218      | 10                     | PRJNA399170             | 36-100               | 31468594   |
| BuschAg | 6B03-4304      | 9                      | PRJNA399170             | 36-100               | 32128172   |
| BuschAg | 6B03-4478      | 8                      | PRJNA399170             | 36-100               | 24757626   |
| BuschAg | 6B04-0290      | 9                      | PRJNA399170             | 36-100               | 32386260   |
| BuschAg | 6B05-0922      | 9                      | PRJNA399170             | 36-100               | 31107792   |

|              |           |    |             |        |          |
|--------------|-----------|----|-------------|--------|----------|
| BuschAg      | 6B06-1132 | 9  | PRJNA399170 | 36-100 | 28973814 |
| UMN          | FEG141-20 | 12 | PRJNA399170 | 36-100 | 33409432 |
| UMN          | FEG153-58 | 13 | PRJNA399170 | 36-100 | 37329190 |
| UMN          | FEG154-47 | 15 | PRJNA399170 | 36-100 | 43448022 |
| UMN          | FEG175-57 | 18 | PRJNA399170 | 36-100 | 52809584 |
| UMN          | FEG183-52 | 7  | PRJNA399170 | 36-100 | 24110934 |
| UMN          | M122      | 10 | PRJNA399170 | 36-100 | 27941342 |
| UMN          | M138      | 3  | PRJNA399170 | 36-126 | 8612356  |
| North Dakota | ND20448   | 10 | PRJNA399170 | 36-100 | 28281994 |
| North Dakota | ND24906   | 8  | PRJNA399170 | 36-100 | 26300402 |
| North Dakota | ND25160   | 9  | PRJNA399170 | 36-100 | 31682064 |
| North Dakota | ND25652   | 8  | PRJNA399170 | 36-100 | 28941294 |
| North Dakota | ND25728   | 10 | PRJNA399170 | 36-100 | 33773866 |
| North Dakota | ND25986   | 10 | PRJNA399170 | 36-100 | 34760524 |
| North Dakota | ND26036   | 16 | PRJNA399170 | 36-126 | 32741474 |
| North Dakota | ND26104   | 17 | PRJNA399170 | 36-126 | 35278280 |

651

652

653 S2 Table. Summary of putatively dSNPs in the founder lines. BA: Busch Agricultural Resources,  
 654 Inc.; MN: University of Minnesota; ND: North Dakota State University. Values listed include  
 655 the number of dSNPs and private dSNPs per inbred line.

| Breeding Program | Line ID   | dSNPs | Private dSNPs |
|------------------|-----------|-------|---------------|
| BA               | 6B01-2218 | 680   | 83            |
| BA               | 6B03-4304 | 668   | 24            |
| BA               | 6B03-4478 | 670   | 37            |

|    |           |     |     |
|----|-----------|-----|-----|
| BA | 6B04-0290 | 665 | 27  |
| BA | 6B05-0922 | 693 | 47  |
| BA | 6B06-1132 | 674 | 25  |
| MN | FEG141-20 | 690 | 107 |
| MN | FEG153-58 | 698 | 13  |
| MN | FEG154-47 | 673 | 18  |
| MN | FEG175-57 | 690 | 36  |
| MN | FEG183-52 | 695 | 38  |
| MN | M138      | 659 | 11  |
| MN | M122      | 686 | 15  |
| ND | ND20448   | 665 | 46  |
| ND | ND24906   | 664 | 40  |
| ND | ND25160   | 669 | 135 |
| ND | ND25652   | 633 | 32  |
| ND | ND25728   | 705 | 72  |
| ND | ND25986   | 690 | 23  |
| ND | ND26036   | 676 | 90  |
| ND | ND26104   | 688 | 172 |

656

657 S3 Table. The ancestral state of all variants was inferred with *Hordeum murinum* ssp. *glaucum*  
658 used as an outgroup. The number of SNPs in each class and the proportion of SNPs for which  
659 ancestral state could be inferred is shown.

660

| Class | Total | Inferred Ancestral State Proportion of Variants with Inferred Ancestral State |
|-------|-------|-------------------------------------------------------------------------------|
|-------|-------|-------------------------------------------------------------------------------|



|               |         |         |       |
|---------------|---------|---------|-------|
| All           | 487,366 | 283,021 | 0.581 |
| Noncoding     | 370,820 | 188,988 | 0.510 |
| Synonymous    | 55,055  | 47,176  | 0.857 |
| Nonsynonymous | 57,723  | 44,258  | 0.767 |
| Deleterious   | 3,768   | 2,599   | 0.510 |

661  
662

663 S4 Table. Basic descriptive statistics from genotyping of the Veracode 384 SNP assay. Values  
664 reported are based on observed genotypes in Illumina genotyping or exome capture resequencing  
665 (for C0 founder lines).

| Cycle | # of individuals | # of families | Proportion missing data | Average pairwise diversity | Average heterozygosity observed | Average # of SNPs per family | Standard Deviation of SNPs per family |
|-------|------------------|---------------|-------------------------|----------------------------|---------------------------------|------------------------------|---------------------------------------|
| C0    | 21               | —             | 0.0471                  | 0.3312                     | 0.0372                          | —                            | —                                     |
| C1    | 1,872            | 78            | 0.0064                  | 0.3025                     | 0.0777                          | 142.86                       | 37.49                                 |
| C2    | 1,904            | 80            | 0.0033                  | 0.3027                     | 0.1505                          | 132.94                       | 38.56                                 |
| C3    | 1,439            | 60            | 0.0789                  | 0.3248                     | 0.1502                          | 145.38                       | 27.90                                 |

666

667 S5 Table. Average pairwise diversity among progeny for sites that were polymorphic in the C0  
668 founder lines. The data is based on phased and imputed genotypes given observed genotypes  
669 from the Veracode 384 SNP assay.

670

| Cycle | All Sites | Noncoding | Synonymous | Nonsynonymous | Deleterious |
|-------|-----------|-----------|------------|---------------|-------------|
| All   | 0.170     | 0.168     | 0.186      | 0.165         | 0.122       |
| C0    | 0.191     | 0.188     | 0.210      | 0.189         | 0.148       |

|    |       |       |       |       |       |
|----|-------|-------|-------|-------|-------|
| C1 | 0.186 | 0.184 | 0.204 | 0.183 | 0.138 |
| C2 | 0.161 | 0.160 | 0.177 | 0.157 | 0.115 |
| C3 | 0.152 | 0.151 | 0.166 | 0.146 | 0.105 |

671

## 672 **References**

673

- 674 1. Ewens WJ (1972) The sampling theory of selectively neutral alleles. *Theor Popul Biol* 3: 87-112.
- 675 2. Watterson GA (1975) On the number of segregating sites in genetical models without  
676 recombination. *Theor Popul Biol* 7: 256-276.
- 677 3. Thornton KR, Foran AJ, Long AD (2013) Properties and modeling of GWAS when complex  
678 disease risk is due to non-complementing, deleterious mutations in genes of large effect. *PLoS*  
679 *Genet* 9: e1003258.
- 680 4. Eyre-Walker A, Woolfit M, Phelps T (2006) The distribution of fitness effects of new deleterious  
681 amino acid mutations in humans. *Genetics* 173: 891-900.
- 682 5. Sanjuán R, Moya A, Elena SF (2004) The distribution of fitness effects caused by single-nucleotide  
683 substitutions in an RNA virus. *Proc Natl Acad Sci USA* 101: 8396-8401.
- 684 6. Thatcher JW, Shaw JM, Dickinson WJ (1998) Marginal fitness contributions of nonessential genes  
685 in yeast. *Proceedings of the National Academy of Sciences* 95: 253-257.
- 686 7. Johnson T, Barton N (2005) Theoretical models of selection and mutation on quantitative traits.  
687 *Philos Trans R Soc Lond B Biol Sci* 360: 1411-1425.
- 688 8. Eyre-Walker A (2010) Evolution in health and medicine Sackler colloquium: Genetic architecture  
689 of a complex trait and its implications for fitness and genome-wide association studies. *Proc Natl*  
690 *Acad Sci USA* 107 Suppl 1: 1752-1756.
- 691 9. Stanton-Geddes J, Paape T, Epstein B, Briskine R, Yoder J, Mudge J, Bharti AK, Farmer AD, Zhou  
692 P, Denny R, May GD, Erlandson S, Yakub M, Sugawara M, Sadowsky MJ, Young ND, Tiffin P  
693 (2013) Candidate genes and genetic architecture of symbiotic and agronomic traits revealed by  
694 whole-genome, sequence-based association genetics in *Medicago truncatula*. *PLoS One* 8: e65688.
- 695 10. Lewontin RC (1974) The genetic basis of evolutionary change. New York: Columbia University  
696 Press. xiii, 346 p.
- 697 11. Beavis WD (1994) The power and deceit of QTL experiments: lessons from comparative QTL  
698 studies. *Proceedings of the forty-ninth annual corn and sorghum industry research conference*: 250-  
699 266.
- 700 12. Rockman MV (2012) The QTN program and the alleles that matter for evolution: all that's gold  
701 does not glitter. *Evolution* 66: 1-17.
- 702 13. Felsenstein J (1974) The evolutionary advantage of recombination. *Genetics* 78: 737-756.
- 703 14. Marth GT, Yu F, Indap AR, Garimella K, Gravel S, Leong WF, Tyler-Smith C, Bainbridge M,  
704 Blackwell T, Zheng-Bradley X, Chen Y, Challis D, Clarke L, Ball EV, Cibulskis K, Cooper DN,  
705 Fulton B, Hartl C, Koboldt D, Muzny D, Smith R, Sougnez C, Stewart C, Ward A, Yu J, Xue Y,  
706 Altshuler D, Bustamante CD, Clark AG, Daly M, DePristo M, Flicek P, Gabriel S, Mardis E,  
707 Palotie A, Gibbs R, 1000 GP (2011) The functional spectrum of low-frequency coding variation.  
708 *Genome Biol* 12: R84.

- 709 15. Lu J, Tang T, Tang H, Huang J, Shi S, Wu CI (2006) The accumulation of deleterious mutations in  
710 rice genomes: a hypothesis on the cost of domestication. *Trends Genet* 22: 126-131.
- 711 16. Ramu P, Esuma W, Kawuki R, Rabbi IY, Egesi C, Bredeson JV, Bart RS, Verma J, Buckler ES, Lu  
712 F (2017) Cassava haplotype map highlights fixation of deleterious mutations during clonal  
713 propagation. *Nat Genet* 49: 959-963.
- 714 17. Marsden CD, Ortega-Del Vecchyo D, O'Brien DP, Taylor JF, Ramirez O, Vilà C, Marques-Bonet  
715 T, Schnabel RD, Wayne RK, Lohmueller KE (2016) Bottlenecks and selective sweeps during  
716 domestication have increased deleterious genetic variation in dogs. *Proceedings of the National  
717 Academy of Sciences* 113: 152-157.
- 718 18. Zhou Y, Massonnet M, Sanjak JS, Cantu D, Gaut BS (2017) Evolutionary genomics of grape (*Vitis  
719 vinifera* ssp. *vinifera*) domestication. *Proc Natl Acad Sci USA* 114: 11715-11720.
- 720 19. Liu Q, Zhou Y, Morrell PL, Gaut BS (2017) Deleterious variants in Asian rice and the potential  
721 cost of domestication. *Mol Biol Evol* 34: 908-924.
- 722 20. Moyers BT, Morrell PL, McKay JK (2017) Genetic costs of domestication and improvement. *J  
723 Hered* 109: 103-116.
- 724 21. Makino T, Rubin CJ, Carneiro M, Axelsson E, Andersson L, Webster MT (2018) Elevated  
725 proportions of deleterious genetic variation in domestic animals and plants. *Genome Biol Evol* 10:  
726 276-290.
- 727 22. Chun S, Fay JC (2009) Identification of deleterious mutations within three human genomes.  
728 *Genome Res* 19: 1553-1561.
- 729 23. Ng PC (2003) SIFT: predicting amino acid changes that affect protein function. *Nucleic Acids Res*  
730 31: 3812-3814.
- 731 24. Kono TJY, Lei L, Shih CH, Hoffman PJ, Morrell PL (2017) Comparative genomics approaches  
732 accurately predict deleterious variants in plants. *bioRxiv*
- 733 25. Kono TJ, Fu F, Mohammadi M, Hoffman PJ, Liu C, Stupar RM, Smith KP, Tiffin P, Fay JC,  
734 Morrell PL (2016) The role of deleterious substitutions in crop genomes. *Mol Biol Evol* 33: 2307-  
735 2317.
- 736 26. Renaut S, Rieseberg LH (2015) The accumulation of deleterious mutations as a consequence of  
737 domestication and improvement in sunflowers and other Compositae crops. *Mol Biol Evol* 32:  
738 2273-2283.
- 739 27. Morrell PL, Buckler ES, Ross-Ibarra J (2012) Crop genomics: advances and applications. *Nat Rev  
740 Genet* 13: 85-96.
- 741 28. Johnsson M, Gaynor RC, Jenko J, Gorjanc G, de Koning D-J, Hickey JM (2018) Removal of alleles  
742 by genome editing — RAGE against the deleterious load.
- 743 29. Smith KP, Thomas W, Gutierrez L, Bull H (2018) Genomics-based barley breeding. In: Stein N,  
744 Muehlbauer GJ, editors. *The Barley Genome*. Cham, Switzerland: Springer. pp. 287-315.
- 745 30. Valluru R, Gazave EE, Fernandes SB, Ferguson JN, Lozano R, Hirannaiah P, Zuo T, Brown PJ,  
746 Leakey ADB, Gore MA, Buckler ES, Bandillo N (2018) Leveraging mutational burden for complex  
747 trait prediction in sorghum.
- 748 31. Mezouk S, Ross-Ibarra J (2014) The pattern and distribution of deleterious mutations in maize.  
749 *G3* 4: 163-171.
- 750 32. Henn BM, Botigué LR, Peischl S, Dupanloup I, Lipatov M, Maples BK, Martin AR, Musharoff S,  
751 Cann H, Snyder MP, Excoffier L, Kidd JM, Bustamante CD (2015) Distance from sub-Saharan  
752 Africa predicts mutational load in diverse human genomes. *Proceedings of the National Academy  
753 of Sciences*
- 754 33. Henn BM, Botigué LR, Bustamante CD, Clark AG, Gravel S (2015) Estimating the mutation load  
755 in human genomes. *Nat Rev Genet* 16: 333-343.
- 756 34. Yang J, Mezouk S, Baumgarten A, Buckler ES, Guill KE, McMullen MD, Mumm RH, Ross-  
757 Ibarra J (2017) Incomplete dominance of deleterious alleles contributes substantially to trait  
758 variation and heterosis in maize. *PLoS Genet* 13: e1007019.

- 759 35. Felsenstein J, Yokoyama S (1976) The evolutionary advantage of recombination. II. Individual  
760 selection for recombination. *Genetics* 83: 845-859.
- 761 36. Charlesworth B, Morgan MT, Charlesworth D (1993) The effect of deleterious mutations on neutral  
762 molecular variation. *Genetics* 134: 1289-1303.
- 763 37. Gazal S, Finucane HK, Furlotte NA, Loh PR, Palamara PF, Liu X, Schoech A, Bulik-Sullivan B,  
764 Neale BM, Gusev A, Price AL (2017) Linkage disequilibrium-dependent architecture of human  
765 complex traits shows action of negative selection. *Nat Genet*
- 766 38. Pardiñas AF, Holmans P, Pocklington AJ, Escott-Price V, Ripke S, Carrera N, Legge SE, Bishop S,  
767 Cameron D, Hamshere ML, Han J, Hubbard L, Lynham A, Mantripragada K, Rees E, MacCabe JH,  
768 McCarroll SA, Baune BT, Breen G, Byrne EM, Dannlowski U, Eley TC, Hayward C, Martin NG,  
769 McIntosh AM, Plomin R, Porteous DJ, Wray NR, Caballero A, Geschwind DH, Huckins LM,  
770 Ruderfer DM, Santiago E, Sklar P, Stahl EA, Won H, Agerbo E, Als TD, Andreassen OA, Bækvad-  
771 Hansen M, Mortensen PB, Pedersen CB, Børglum AD, Bybjerg-Grauholm J, Djurovic S, Durmishi  
772 N, Pedersen MG, Golimbet V, Grove J, Hougaard DM, Mattheisen M, Molden E, Mors O,  
773 Nordentoft M, Pejovic-Milovancevic M, Sigurdsson E, Silagadze T, Hansen CS, Stefansson K,  
774 Stefansson H, Steinberg S, Tosato S, Werge T, GERAD1 C, CRESTAR C, Collier DA, Rujescu D,  
775 Kirov G, Owen MJ, O'Donovan MC, Walters JTR, GERAD1 C, CRESTAR C, GERAD1 C,  
776 CRESTAR C (2018) Common schizophrenia alleles are enriched in mutation-intolerant genes and  
777 in regions under strong background selection. *Nat Genet*
- 778 39. Meuwissen THE, Hayes BJ, Goddard ME (2001) Prediction of total genetic value using genome-  
779 wide dense marker maps. *Genetics* 157: 1819-1829.
- 780 40. Edwards SM, Sørensen IF, Sarup P, Mackay TF, Sørensen P (2016) Genomic prediction for  
781 quantitative traits is improved by mapping variants to gene ontology categories in *Drosophila*  
782 *melanogaster*. *Genetics* 203: 1871-1883.
- 783 41. Tiede T, Smith KP (2018) Evaluation of retrospective optimization of genomic selection for yield  
784 and disease resistance in spring barley. *Mol Breed*
- 785 42. Muñoz-Amatriaín M, Lonardi S, Luo M, Madishetty K, Svensson JT, Moscou MJ, Wanamaker S,  
786 Jiang T, Kleinhofs A, Muehlbauer GJ, Wise RP, Stein N, Ma Y, Rodriguez E, Kudrna D, Bhat PR,  
787 Chao S, Condamine P, Heinen S, Resnik J, Wing R, Witt HN, Alpert M, Beccuti M, Bozdag S,  
788 Cordero F, Mirebrahim H, Ounit R, Wu Y, You F, Zheng J, Simková H, Doležel J, Grimwood J,  
789 Schmutz J, Duma D, Altschmied L, Blake T, Bregitzer P, Cooper L, Dilbirligi M, Falk A, Feiz L,  
790 Graner A, Gustafson P, Hayes PM, Lemaux P, Mammadov J, Close TJ (2015) Sequencing of  
791 15 622 gene-bearing BACs clarifies the gene-dense regions of the barley genome. *Plant J* 84: 216-  
792 227.
- 793 43. Mascher M, Gundlach H, Himmelbach A, Beier S, Twardziok SO, Wicker T, Radchuk V, Dockter  
794 C, Hedley PE, Russell J, Bayer M, Ramsay L, Liu H, Haberer G, Zhang XQ, Zhang Q, Barrero RA,  
795 Li L, Taudien S, Groth M, Felder M, Hastie A, Šimková H, Staňková H, Vrána J, Chan S, Muñoz-  
796 Amatriaín M, Ounit R, Wanamaker S, Bolser D, Colmsee C, Schmutzer T, Aliyeva-Schnorr L,  
797 Grasso S, Tanskanen J, Chailyan A, Sampath D, Heavens D, Clissold L, Cao S, Chapman B, Dai F,  
798 Han Y, Li H, Li X, Lin C, McCooke JK, Tan C, Wang P, Wang S, Yin S, Zhou G, Poland JA,  
799 Bellgard MI, Borisjuk L, Houben A, Doležel J, Ayling S, Lonardi S, Kersey P, Langridge P,  
800 Muehlbauer GJ, Clark MD, Caccamo M, Schulman AH, Mayer KFX, Platzer M, Close TJ, Scholz  
801 U, Hansson M, Zhang G, Braumann I, Spannagl M, Li C, Waugh R, Stein N (2017) A chromosome  
802 conformation capture ordered sequence of the barley genome. *Nature* 544: 427-433.
- 803 44. Lunter G, Goodson M (2011) Stampy: a statistical algorithm for sensitive and fast mapping of  
804 Illumina sequence reads. *Genome Res* 21: 936-939.
- 805 45. Whalen A, Ros-Freixedes R, Wilson DL, Gorjanc G, Hickey JM (2017) Hybrid peeling for fast and  
806 accurate calling, phasing, and imputation with sequence data of any coverage in pedigrees. *bioRxiv*
- 807 46. Zhou X, Stephens M (2012) Genome-wide efficient mixed-model analysis for association studies.  
808 *Nat Genet* 44: 821-824.

- 809 47. Fang Z, Eule-Nashoba A, Powers C, Kono TJY, Takuno S, Morrell PL, Smith KP (2013)  
810 Comparative analyses identify the contributions of exotic donors to disease resistance in a barley  
811 experimental population. *G3: Genes, Genomes, Genetics* 3: 1945-1953.
- 812 48. Tinker NA, Mather DE, Rossnagel BG, Kasha KJ, Kleinhofs A, Hayes PM, Falk DE, Ferguson T,  
813 Shugar LP, Legge WG (1996) Regions of the genome that affect agronomic performance in two-  
814 row barley. *Crop Sci* 36: 1053-1062.
- 815 49. Urrea CA, Horsley RD, Steffenson BJ, Schwarz PB (2002) Heritability of Fusarium head blight  
816 resistance and deoxynivalenol accumulation from barley accession CIho 4196. *Crop Sci* 42: 1404-  
817 1408.
- 818 50. Rodgers-Melnick E, Bradbury PJ, Elshire RJ, Glaubitz JC, Acharya CB, Mitchell SE, Li C, Li Y,  
819 Buckler ES (2015) Recombination in diverse maize is stable, predictable, and associated with  
820 genetic load. *Proceedings of the National Academy of Sciences* 112: 3823-3828.
- 821 51. Marais G, Charlesworth B, Wright SI (2004) Recombination and base composition: the case of the  
822 highly self-fertilizing plant *Arabidopsis thaliana*. *Genome Biol* 5: R45.
- 823 52. Brandvain Y, Wright SI (2016) The limits of natural selection in a nonequilibrium world. *Trends*  
824 *Genet* 32: 201-210.
- 825 53. Eyre-Walker A, Keightley PD (2007) The distribution of fitness effects of new mutations. *Nat Rev*  
826 *Genet* 8: 610-618.
- 827 54. Endelman JB (2011) Ridge regression and other kernels for genomic selection with R package  
828 rrBLUP. *The Plant Genome Journal* 4: 250.
- 829 55. Team RC (2018) R: A language and environment for statistical computing [Internet]. Vienna,  
830 Austria: R Foundation for Statistical Computing; 2018. Available: <https://www.R-project.org/> via  
831 the Internet. Accessed x.
- 832 56. Close TJ, Bhat PR, Lonardi S, Wu Y, Rostoks N, Ramsay L, Druka A, Stein N, Svensson JT,  
833 Wanamaker S, Bozdag S, Roose ML, Moscou MJ, Chao S, Varshney RK, Szucs P, Sato K, Hayes  
834 PM, Matthews DE, Kleinhofs A, Muehlbauer GJ, DeYoung J, Marshall DF, Madishetty K, Fenton  
835 RD, Condamine P, Graner A, Waugh R (2009) Development and implementation of high-  
836 throughput SNP genotyping in barley. *BMC Genomics* 10: 582.
- 837 57. Lei L, Poets AM, Liu C, Wyant SR, Hoffman PJ, Carter CK, Trantow RM, Shaw BG, Li X,  
838 Muehlbauer G, Katagiri F, Morrell PL (2018) Discovery of barley gene candidates for low  
839 temperature and drought tolerance via environmental association.
- 840 58. Wright MH, Tung CW, Zhao K, Reynolds A, McCouch SR, Bustamante CD (2010) ALCHEMY: a  
841 reliable method for automated SNP genotype calling for small batch sizes and highly homozygous  
842 populations. *Bioinformatics* 26: 2952-2960.
- 843 59. Chang CC, Chow CC, Tellier LC, Vattikuti S, Purcell SM, Lee JJ (2015) Second-generation  
844 PLINK: rising to the challenge of larger and richer datasets. *Gigascience* 4: 7.
- 845 60. Kleinhofs A, Kilian A, Maroof MAS, Biyashev RM, Hayes P, Chen FQ, Lapitan N, Fenwick A,  
846 Blake TK, Kanazin V, Ananiev E, Dahleen L, Kudrna D, Bollinger J, Knapp SJ, Liu B, Sorrells M,  
847 Heun M, Franckowiak JD, Hoffman D, Skadsen R, Steffenson BJ (1993) A molecular, isozyme and  
848 morphological map of the barley (*Hordeum vulgare*) genome. *Theor Appl Genet* 86: 705-712.
- 849 61. Muñoz-Amatriaín M, Moscou MJ, Bhat PR, Svensson JT, Bartoš J, Suchánková P, Šimková H,  
850 Endo TR, Fenton RD, Lonardi S, Castillo AM, Chao S, Cistué L, Cuesta-Marcos A, Forrest KL,  
851 Hayden MJ, Hayes PM, Horsley RD, Makoto K, Moody D, Sato K, Vallés MP, Wulff BBH,  
852 Muehlbauer GJ, Doležel J, Close\* TJ (2011) An improved consensus linkage map of barley based  
853 on flow-sorted chromosomes and single nucleotide polymorphism markers. *The Plant Genome*  
854 *Journal* 4: 238.
- 855 62. Mascher M, Richmond TA, Gerhardt DJ, Himmelbach A, Clissold L, Sampath D, Ayling S,  
856 Steuernagel B, Pfeifer M, D'Ascenzo M, Akhunov ED, Hedley PE, Gonzales AM, Morrell PL,  
857 Kilian B, Blattner FR, Scholz U, Mayer KF, Flavell AJ, Muehlbauer GJ, Waugh R, Jeddelloh JA,  
858 Stein N (2013) Barley whole exome capture: a tool for genomic research in the genus *Hordeum* and  
859 beyond. *Plant J* 76: 494-505.

- 860 63. Li H, Durbin R (2009) Fast and accurate short read alignment with Burrows-Wheeler transform.  
861 Bioinformatics 25: 1754-1760.
- 862 64. Morrell PL, Toleno DM, Lundy KE, Clegg MT (2006) Estimating the contribution of mutation,  
863 recombination and gene conversion in the generation of haplotypic diversity. Genetics 173: 1705-  
864 1723.
- 865 65. Morrell PL, Gonzales AM, Meyer KK, Clegg MT (2014) Resequencing data indicate a modest  
866 effect of domestication on diversity in barley: a cultigen with multiple origins. J Hered 105: 253-  
867 264.
- 868 66. Li H, Handsaker B, Wysoker A, Fennell T, Ruan J, Homer N, Marth G, Abecasis G, Durbin R,  
869 1000 GPDPS (2009) The Sequence Alignment/Map format and SAMtools. Bioinformatics 25:  
870 2078-2079.
- 871 67. DePristo MA, Banks E, Poplin R, Garimella KV, Maguire JR, Hartl C, Philippakis AA, del Angel  
872 G, Rivas MA, Hanna M, McKenna A, Fennell TJ, Kernytsky AM, Sivachenko AY, Cibulskis K,  
873 Gabriel SB, Altshuler D, Daly MJ (2011) A framework for variation discovery and genotyping  
874 using next-generation DNA sequencing data. Nat Genet 43: 491-498.
- 875 68. McKenna A, Hanna M, Banks E, Sivachenko A, Cibulskis K, Kernytsky A, Garimella K, Altshuler  
876 D, Gabriel S, Daly M, DePristo MA (2010) The Genome Analysis Toolkit: a MapReduce  
877 framework for analyzing next-generation DNA sequencing data. Genome Res 20: 1297-1303.
- 878 69. Caldwell KS, Russell J, Langridge P, Powell W (2006) Extreme population-dependent linkage  
879 disequilibrium detected in an inbreeding plant species, *Hordeum vulgare*. Genetics 172: 557-567.
- 880 70. Jakob SS, Meister A, Blattner FR (2004) The considerable genome size variation of *Hordeum*  
881 species (Poaceae) is linked to phylogeny, life form, ecology, and speciation rates. Mol Biol Evol  
882 21: 860-869.
- 883 71. Durvasula A, Kent TV, Hoffman PJ, Liu C, Kono TJY, Morrell PL, Ross-Ibarra J (2016) ANGSD-  
884 wrapper: utilities for analyzing next generation sequencing data. Molecular Ecology Resources 16:  
885 1449-1454.
- 886 72. Korneliussen T, Albrechtsen A, Nielsen R (2014) ANGSD: Analysis of Next Generation  
887 Sequencing Data. BMC Bioinformatics 15: 356.
- 888 73. Hoffman PJ, Wyant SR, Kono TJY, Morrell PL (2018) MorrellLab/sequence\_handling: Release  
889 v2.0: SNP calling with GATK 3.8. Available: <https://zenodo.org/record/1257692#.WxLNny2ZOL5>  
890 via the Internet. Accessed x.
- 891 74. Wang K, Li M, Hakonarson H (2010) ANNOVAR: functional annotation of genetic variants from  
892 high-throughput sequencing data. Nucleic Acids Res 38: e164.
- 893 75. Choi Y, Sims GE, Murphy S, Miller JR, Chan AP (2012) Predicting the functional effect of amino  
894 acid substitutions and indels. PLoS One 7: e46688.
- 895 76. Adzhubei I, Jordan DM, Sunyaev SR (2013) Predicting functional effect of human missense  
896 mutations using PolyPhen-2. Curr Protoc Hum Genet Chapter 7: Unit7.20.
- 897 77. Kono TJY, Lei L, Shih C-H, Hoffman PJ, Morrell PL, Fay JC (2018) Comparative genomics  
898 approaches accurately predict deleterious variants in plants. G3: Genes, Genomes, Genetics g3.  
899 200563.2018.
- 900 78. Lin C-S, Poushinsky GREG (1985) A modified augmented design (type 2) for rectangular plots.  
901 Can J Plant Sci 65: 743-749.
- 902 79. Massman J, Cooper B, Horsley R, Neate S, Dill-Macky R, Chao S, Dong Y, Schwarz P,  
903 Muehlbauer GJ, Smith KP (2011) Genome-wide association mapping of Fusarium head blight  
904 resistance in contemporary barley breeding germplasm. Mol Breeding 27: 439-454.  
905
